# Supplementary material for: WetA bridges cellular and chemical development in Aspergillus flavus
Source: PubMed Central journal article supplement (PMC5489174; doi:10.1371/journal.pone.0179571), 2017-06-28

S1 Fig. Microscopy images of  $\Delta wetA$  colonies under light and dark conditions

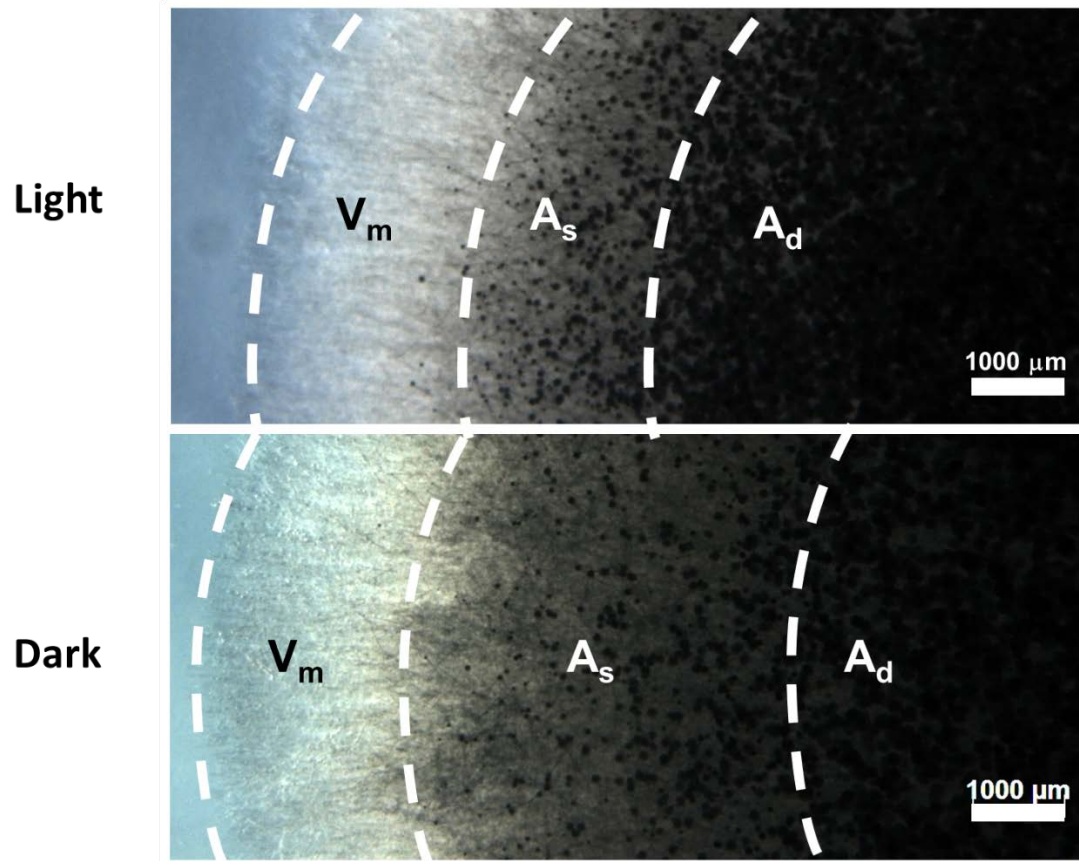

Supplement: pone.0179571.s001.pdf [file pone.0179571.s001.pdf]
