# Supplementary material for: WetA bridges cellular and chemical development in Aspergillus flavus
Source: PubMed Central journal article supplement (PMC5489174; doi:10.1371/journal.pone.0179571), 2017-06-28

S2 Fig. AFB1 production of WT and  $\Delta wetA$  conidia by TLC analysis

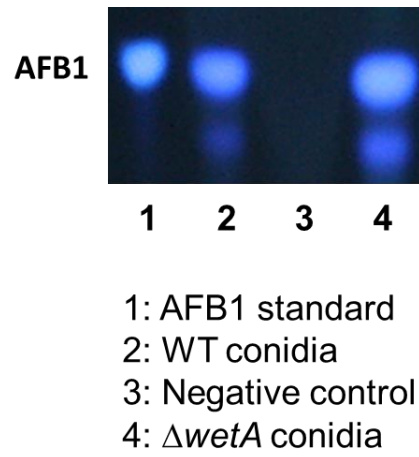

Supplement: pone.0179571.s002.pdf [file pone.0179571.s002.pdf]
