# Supplementary material for: WetA bridges cellular and chemical development in Aspergillus flavus
Source: PubMed Central journal article supplement (PMC5489174; doi:10.1371/journal.pone.0179571), 2017-06-28
Supplement: pone.0179571.s003.pdf [file pone.0179571.s003.pdf]

**S1 Table. *Aspergillus* strains and oligonucleotides used in this study.**

| STRAINS  |                                        |                             |
|----------|----------------------------------------|-----------------------------|
| Name     | GENOTYPE                               | SOURCE                      |
| NRRL3357 | Wild-type                              | Fungal Genetic Stock Center |
| 3357.5   | <i>pyrG</i> <sup>-</sup>               | [1]                         |
| TMY1     | $\Delta wetA::AfupyrG^+; pyrG^-$       | This study                  |
| TMY2     | $\Delta wetA::AfupyrG^+; pyrG^-; wetA$ | This study                  |

| OLIGONUCLEOTIDES |                                                     |                                         |
|------------------|-----------------------------------------------------|-----------------------------------------|
| Name             | SEQUENCE (5'→3')                                    | PURPOSE                                 |
| oMY-19           | ggagagcagattagcacctg                                | 5' flanking of <i>wetA</i>              |
| oMY-20           | ttacctcgacatgccacag                                 | 3' flanking of <i>wetA</i>              |
| oMY-21           | ccatgcatggttactggagg                                | 5' nested of <i>wetA</i>                |
| oMY-22           | atgcgaccacgaatgcatcc                                | 3' nested of <i>wetA</i>                |
| oMY-51           | gggtgaagagcattgtttgaggcacgatggtggtccaagctcagctgctc  | 5' <i>wetA</i> with <i>AfupyrG</i> tail |
| oMY-52           | tcagtgcctcctctcagacagaatatcgggtgttctgatggatccggagtc | 3' <i>wetA</i> with <i>AfupyrG</i> tail |
| oMY-25           | gaccactcgttcaacaacgatg                              | 5' <i>wetA</i>                          |
| oMY-26           | cgtactgcattaagtgcgg                                 | 3' <i>wetA</i>                          |
| oJH-84           | gctgaagtcatacagggccaaa                              | 5' <i>AfupyrG</i> marker                |
| oJH-85           | atcgtcgggaggtattgtcgtcac                            | 3' <i>AfupyrG</i> marker                |

1. He Z-M, Price MS, Obrian GR, Georgianna DR, Payne GA. Improved protocols for functional analysis in the pathogenic fungus *Aspergillus flavus*. BMC Microbiol. BioMed Central; 2007;7: 104. doi:10.1186/1471-2180-7-104
