# Supplementary material for: WetA bridges cellular and chemical development in Aspergillus flavus
Source: PubMed Central journal article supplement (PMC5489174; doi:10.1371/journal.pone.0179571), 2017-06-28
Supplement: pone.0179571.s004.pdf [file pone.0179571.s004.pdf]

**S2 Table. Top enriched GO categories of decreased mRNA levels in the *ΔwetA* conidia.**

| <b>GO Category</b>                                                             | <b># of Genes</b> | <b>% of Genes in Category</b> |
|--------------------------------------------------------------------------------|-------------------|-------------------------------|
| <b>Biological Process</b>                                                      |                   |                               |
| metabolic process                                                              | 846               | 25.22%                        |
| biosynthetic process                                                           | 298               | 27.41%                        |
| organic substance biosynthetic process                                         | 280               | 27.78%                        |
| cellular biosynthetic process                                                  | 275               | 28.09%                        |
| oxidation-reduction process                                                    | 235               | 28.87%                        |
| cellular nitrogen compound biosynthetic process                                | 209               | 33.07%                        |
| organonitrogen compound metabolic process                                      | 204               | 30.96%                        |
| organic cyclic compound biosynthetic process                                   | 161               | 28.75%                        |
| heterocycle biosynthetic process                                               | 157               | 30.13%                        |
| organonitrogen compound biosynthetic process                                   | 153               | 31.94%                        |
| cellular amide metabolic process                                               | 94                | 33.57%                        |
| amide biosynthetic process                                                     | 86                | 33.46%                        |
| peptide metabolic process                                                      | 73                | 33.64%                        |
| translation                                                                    | 60                | 38.22%                        |
| organophosphate metabolic process                                              | 60                | 34.29%                        |
| cofactor metabolic process                                                     | 44                | 35.48%                        |
| nucleoside phosphate metabolic process                                         | 40                | 40.00%                        |
| coenzyme metabolic process                                                     | 37                | 39.36%                        |
| pyridine-containing compound metabolic process                                 | 19                | 54.29%                        |
| pyridine nucleotide metabolic process                                          | 17                | 54.84%                        |
| nicotinamide nucleotide metabolic process                                      | 17                | 54.84%                        |
| vitamin metabolic process                                                      | 16                | 66.67%                        |
| cellular modified amino acid metabolic process                                 | 14                | 51.85%                        |
| cellular modified amino acid biosynthetic process                              | 13                | 59.09%                        |
| tetrapyrrole metabolic process                                                 | 9                 | 69.23%                        |
| GTP metabolic process                                                          | 6                 | 100.00%                       |
| molybdopterin cofactor metabolic process                                       | 6                 | 85.71%                        |
| prosthetic group metabolic process                                             | 6                 | 85.71%                        |
| <b>Molecular Function</b>                                                      |                   |                               |
| oxidoreductase activity                                                        | 1095              | 29.59%                        |
| RNA polymerase II transcription factor activity, sequence-specific DNA binding | 167               | 35.33%                        |
| structural molecule activity                                                   | 115               | 46.96%                        |
| structural constituent of ribosome                                             | 97                | 54.64%                        |

| Cellular Component                      |    |        |
|-----------------------------------------|----|--------|
| extracellular region                    | 74 | 29.60% |
| intracellular ribonucleoprotein complex | 53 | 39.85% |
| ribonucleoprotein complex               | 53 | 39.85% |
| ribosome                                | 53 | 54.64% |
| ribosomal subunit                       | 12 | 63.16% |
| small ribosomal subunit                 | 8  | 80.00% |
