# Supplementary material for: WetA bridges cellular and chemical development in Aspergillus flavus
Source: PubMed Central journal article supplement (PMC5489174; doi:10.1371/journal.pone.0179571), 2017-06-28
Supplement: pone.0179571.s008.pdf [file pone.0179571.s008.pdf]

**S6 Table. DEGs related to asexual development.**

| <b>Gene ID</b>     | <b>Log2 Fold Change</b> | <b>Common Name</b> |
|--------------------|-------------------------|--------------------|
| <b>AFLA_034670</b> | 5.31                    | <i>prpA</i>        |
| <b>AFLA_033400</b> | 4.17                    | <i>msdS</i>        |
| <b>AFLA_021100</b> | 3.74                    | <i>ppoD</i>        |
| <b>AFLA_099380</b> | 3.60                    | <i>wsc1</i>        |
| <b>AFLA_136030</b> | 3.37                    | <i>chsE</i>        |
| <b>AFLA_082850</b> | 3.31                    | <i>brlA</i>        |
| <b>AFLA_137320</b> | 3.04                    | <i>flbC</i>        |
| <b>AFLA_052510</b> | 3.01                    | <i>wsc3</i>        |
| <b>AFLA_029620</b> | 2.96                    | <i>abaA</i>        |
| <b>AFLA_008970</b> | 2.89                    | <i>llmF</i>        |
| <b>AFLA_031700</b> | 2.89                    | <i>midA</i>        |
| <b>AFLA_087350</b> | 2.86                    | <i>sltA</i>        |
| <b>AFLA_136410</b> | 2.81                    | <i>medA</i>        |
| <b>AFLA_131330</b> | 2.72                    | <i>nsdC</i>        |
| <b>AFLA_060590</b> | 2.59                    | <i>chsG</i>        |
| <b>AFLA_071090</b> | 2.51                    | <i>esdC</i>        |
| <b>AFLA_028750</b> | 2.49                    | <i>llmB</i>        |
| <b>AFLA_078290</b> | 2.43                    | <i>chsF</i>        |
| <b>AFLA_029150</b> | 2.40                    | <i>pcl1</i>        |
| <b>AFLA_086010</b> | 2.40                    | <i>figA</i>        |
| <b>AFLA_135550</b> | 2.38                    | <i>mob1</i>        |
| <b>AFLA_046990</b> | 2.32                    | <i>stuA</i>        |
| <b>AFLA_091490</b> | 2.27                    | <i>mtfA</i>        |
| <b>AFLA_102850</b> | 2.22                    | <i>rgdA</i>        |
| <b>AFLA_092800</b> | 2.17                    | <i>nudA</i>        |
| <b>AFLA_042780</b> | 1.95                    | <i>chsA</i>        |
| <b>AFLA_066330</b> | 1.85                    | <i>odeA</i>        |
| <b>AFLA_083100</b> | 1.81                    | <i>zipA</i>        |
| <b>AFLA_019100</b> | 1.74                    | <i>fbx15</i>       |
| <b>AFLA_098380</b> | 1.72                    | <i>rodA</i>        |
| <b>AFLA_114760</b> | 1.72                    | <i>chsB</i>        |
| <b>AFLA_134030</b> | 1.71                    | <i>flbA</i>        |
| <b>AFLA_136540</b> | 1.71                    | <i>ime2</i>        |
| <b>AFLA_020210</b> | 1.68                    | <i>nsdD</i>        |
| <b>AFLA_093230</b> | 1.66                    | <i>phnA</i>        |
| <b>AFLA_037320</b> | 1.58                    | <i>rho1</i>        |

|                    |       |                      |
|--------------------|-------|----------------------|
| <b>AFLA_127920</b> | 1.57  | <i>crzA</i>          |
| <b>AFLA_068440</b> | 1.53  | <i>cchl</i>          |
| <b>AFLA_132340</b> | 1.48  | <i>vapA</i>          |
| <b>AFLA_048880</b> | 1.48  | <i>steC</i>          |
| <b>AFLA_004760</b> | 1.40  | <i>sscI</i>          |
| <b>AFLA_091740</b> | 1.39  | <i>sidB</i>          |
| <b>AFLA_110620</b> | 1.39  | <i>atgI</i>          |
| <b>AFLA_020990</b> | 1.34  | <i>ugtA</i>          |
| <b>AFLA_030430</b> | 1.23  | <i>ppoC</i>          |
| <b>AFLA_022400</b> | 1.23  | <i>atgH</i>          |
| <b>AFLA_085200</b> | 1.08  | <i>pac2/osaB</i>     |
| <b>AFLA_086900</b> | 1.02  | <i>amsI</i>          |
| <b>AFLA_028410</b> | -1.02 | <i>pbcr</i>          |
| <b>AFLA_088670</b> | -1.05 | <i>kexI</i>          |
| <b>AFLA_110790</b> | -1.07 | <i>ricA</i>          |
| <b>AFLA_082510</b> | -1.07 | <i>tcpA</i>          |
| <b>AFLA_065850</b> | -1.09 | <i>fphA</i>          |
| <b>AFLA_114720</b> | -1.12 | <i>bemI</i>          |
| <b>AFLA_048000</b> | -1.15 | <i>rhbA</i>          |
| <b>AFLA_029640</b> | -1.26 | <i>nudG</i>          |
| <b>AFLA_032870</b> | -1.36 | <i>pkaR</i>          |
| <b>AFLA_044820</b> | -1.43 | <i>swom</i>          |
| <b>AFLA_026790</b> | -1.46 | <i>ppoA</i>          |
| <b>AFLA_055650</b> | -1.50 | <i>osaA</i>          |
| <b>AFLA_112660</b> | -1.53 | <i>argB</i>          |
| <b>AFLA_066460</b> | -1.90 | <i>veA</i>           |
| <b>AFLA_014260</b> | -2.00 | <i>rodB</i>          |
| <b>AFLA_091910</b> | -2.09 | <i>pkaB</i>          |
| <b>AFLA_131370</b> | -2.30 | <i>tpsC</i>          |
| <b>AFLA_093580</b> | -2.48 | <i>tmpA</i>          |
| <b>AFLA_039530</b> | -2.59 | <i>fluG</i>          |
| <b>AFLA_135040</b> | -2.63 | <i>pkaA</i>          |
| <b>AFLA_087630</b> | -2.65 | <i>tpsA</i> ortholog |
| <b>AFLA_005520</b> | -2.82 | <i>sfgA</i>          |
| <b>AFLA_026900</b> | -3.70 | <i>vosA</i>          |
| <b>AFLA_060780</b> | -4.32 | <i>dewA</i>          |
| <b>AFLA_062460</b> | -5.13 | <i>nce102</i>        |
| <b>AFLA_006170</b> | -5.70 | <i>wA/pksP</i>       |
| <b>AFLA_074470</b> | -6.25 | <i>rftI</i>          |

**AFLA\_052030**

-10.74

*wetA*

**AFLA\_120760**

-11.01

*ppoB*
