# Supplementary material for: WetA bridges cellular and chemical development in Aspergillus flavus
Source: PubMed Central journal article supplement (PMC5489174; doi:10.1371/journal.pone.0179571), 2017-06-28
Supplement: pone.0179571.s010.pdf [file pone.0179571.s010.pdf]

**S8 Table. mRNA levels of secondary metabolic clustered genes in *A. flavus*.**

| <b>Cluster</b> | <b>Gene ID</b> | <b>Log<sub>2</sub> Fold Change</b> | <b>Description</b>                                  |
|----------------|----------------|------------------------------------|-----------------------------------------------------|
| 1              | AFLA_125780    | -                                  | ATP-binding cassette transporter, putative          |
| 1              | AFLA_125770    | -1.76                              | LysR family regulatory protein, putative            |
| 1              | AFLA_125760    | -1.24                              | squalene-hopene-cyclase, putative                   |
| 2              | AFLA_126710    | -                                  | polyketide synthase, putative                       |
| 2              | AFLA_126720    | -                                  | hypothetical protein                                |
| 2              | AFLA_126730    | -                                  | conserved hypothetical protein                      |
| 2              | AFLA_126740    | -                                  | lipase precursor, putative                          |
| 3              | AFLA_126970    | -                                  | arginine permease, putative                         |
| 3              | AFLA_126980    | -                                  | conserved hypothetical protein                      |
| 3              | AFLA_126990    | -                                  | conserved hypothetical protein                      |
| 3              | AFLA_127000    | -                                  | hypothetical protein                                |
| 3              | AFLA_127010    | -                                  | conserved hypothetical protein                      |
| 3              | AFLA_127020    | -                                  | monooxygenase, putative                             |
| 3              | AFLA_127030    | -                                  | conserved hypothetical protein                      |
| 3              | AFLA_127040    | -                                  | MFS monocarboxylate transporter, putative           |
| 3              | AFLA_127050    | -                                  | conserved hypothetical protein                      |
| 3              | AFLA_127060    | -                                  | conserved hypothetical protein                      |
| 3              | AFLA_127070    | -                                  | short-chain dehydrogenase, putative                 |
| 3              | AFLA_127080    | -                                  | conserved hypothetical protein                      |
| 3              | AFLA_127100    | -                                  | conserved hypothetical protein                      |
| 3              | AFLA_127110    | -                                  | MFS transporter, putative                           |
| 3              | AFLA_127120    | -                                  | hypothetical protein                                |
| 3              | AFLA_127130    | -                                  | conserved hypothetical protein                      |
| 3              | AFLA_127140    | -                                  | conserved hypothetical protein                      |
| 3              | AFLA_127150    | -                                  | hypothetical protein                                |
| 3              | AFLA_127160    | -                                  | NB-ARC and TPR domain protein                       |
| 3              | AFLA_127170    | -                                  | penicillin-binding protein, putative                |
| 3              | AFLA_127090    | -2.42                              | polyketide synthase, putative                       |
| 4              | AFLA_128040    | -                                  | efflux pump antibiotic resistance protein, putative |
| 4              | AFLA_128060    | -                                  | polyketide synthase, putative                       |
| 4              | AFLA_128050    | 1.12                               | conserved hypothetical protein                      |
| 5              | AFLA_128160    | -                                  | C6 transcription factor, putative                   |
| 5              | AFLA_128170    | -                                  | NRPS-like enzyme, putative                          |
| 6              | AFLA_053900    | -                                  | conserved hypothetical protein                      |
| 6              | AFLA_053910    | -                                  | pantothenate transporter, putative                  |

|   |             |       |                                                            |
|---|-------------|-------|------------------------------------------------------------|
| 6 | AFLA_053950 | -     | conserved hypothetical protein                             |
| 6 | AFLA_053880 | -2.39 | hypothetical protein                                       |
| 6 | AFLA_053930 | -2.24 | multicopper oxidase, putative                              |
| 6 | AFLA_053940 | -1.99 | multicopper oxidase, putative                              |
| 6 | AFLA_053890 | -1.89 | acetylcholinesterase, putative                             |
| 6 | AFLA_053870 | 1.99  | polyketide synthase, putative                              |
| 6 | AFLA_053920 | 3.88  | hypothetical protein                                       |
| 7 | AFLA_054040 | -     | conserved hypothetical protein                             |
| 7 | AFLA_054070 | -     | conserved hypothetical protein                             |
| 7 | AFLA_054090 | -     | polyketide synthase, putative                              |
| 7 | AFLA_054100 | -     | DUF341 family oxidoreductase, putative                     |
| 7 | AFLA_054080 | -2.74 | Na(+)/H(+) antiporter, putative                            |
| 7 | AFLA_054050 | 1.24  | ABC multidrug transporter, putative                        |
| 7 | AFLA_054060 | 5.22  | ATP/GTP-binding protein, putative                          |
| 8 | AFLA_054180 | -     | conserved hypothetical protein                             |
| 8 | AFLA_054190 | -     | conserved hypothetical protein                             |
| 8 | AFLA_054200 | -     | hypothetical protein                                       |
| 8 | AFLA_054210 | -     | ankyrin repeat-containing protein, putative                |
| 8 | AFLA_054220 | -     | conserved hypothetical protein                             |
| 8 | AFLA_054230 | -     | conserved hypothetical protein                             |
| 8 | AFLA_054250 | -     | conserved hypothetical protein                             |
| 8 | AFLA_054260 | -     | MFS transporter, putative                                  |
| 8 | AFLA_054270 | -     | NRPS-like enzyme, putative                                 |
| 8 | AFLA_054280 | -     | conserved hypothetical protein                             |
| 8 | AFLA_054290 | -     | aldehyde reductase I (ARI), putative                       |
| 8 | AFLA_054300 | -     | pantothenate transporter, putative                         |
| 8 | AFLA_054320 | -     | NPP1 domain protein, putative                              |
| 8 | AFLA_054370 | -3.48 | short-chain dehydrogenase, putative                        |
| 8 | AFLA_054310 | -3.24 | conserved hypothetical protein                             |
| 8 | AFLA_054330 | -2.68 | conserved hypothetical protein                             |
| 8 | AFLA_054340 | -1.28 | isoflavone reductase family protein                        |
| 8 | AFLA_054350 | -1.27 | actin-binding protein Fragmin, putative                    |
| 8 | AFLA_054240 | 2.53  | conserved hypothetical protein                             |
| 8 | AFLA_054360 | 3.36  | conserved hypothetical protein                             |
| 9 | AFLA_008700 | -     | monooxygenase, putative                                    |
| 9 | AFLA_008710 | -     | monooxygenase, putative                                    |
| 9 | AFLA_008740 | -     | oxidoreductase, short chain dehydrogenase/reductase family |
| 9 | AFLA_008760 | -     | multidrug resistance protein, putative                     |

|    |             |       |                                                       |
|----|-------------|-------|-------------------------------------------------------|
| 9  | AFLA_008770 | -     | nonribosomal peptide synthase, putative               |
| 9  | AFLA_008780 | -     | asparagine synthetase, putative                       |
| 9  | AFLA_008790 | -     | conserved hypothetical protein                        |
| 9  | AFLA_008730 | -3.17 | hypothetical protein                                  |
| 9  | AFLA_008720 | -1.54 | conserved hypothetical protein                        |
| 9  | AFLA_008750 | 3.63  | hypothetical protein                                  |
| 10 | AFLA_009980 | -     | ABC multidrug transporter, putative                   |
| 10 | AFLA_010030 | -     | oxidoreductase, 2OG-Fe(II) oxygenase family, putative |
| 10 | AFLA_010040 | -     | conserved hypothetical protein                        |
| 10 | AFLA_010050 | -3.13 | alcohol dehydrogenase, putative                       |
| 10 | AFLA_010020 | -1.84 | nonribosomal peptide synthase, putative               |
| 10 | AFLA_010010 | -1.18 | nonribosomal peptide synthase, putative               |
| 10 | AFLA_010000 | 1.98  | polyketide synthase, putative                         |
| 10 | AFLA_009990 | 3.05  | 1-aminocyclopropane-1-carboxylate oxidase, putative   |
| 11 | AFLA_010590 | -     | siderophore biosynthesis lipase/esterase, putative    |
| 11 | AFLA_010600 | -     | siderophore biosynthesis acetylase AceI, putative     |
| 11 | AFLA_010610 | -     | enoyl-CoA hydratase/isomerase family protein          |
| 11 | AFLA_010640 | -2.52 | MFS siderophore transporter, putative                 |
| 11 | AFLA_010630 | -2.47 | ABC multidrug transporter SidT                        |
| 11 | AFLA_010620 | 1.56  | nonribosomal siderophore peptide synthase Sid2        |
| 12 | AFLA_079370 | -     | hypothetical protein                                  |
| 12 | AFLA_079380 | -     | NRPS-like enzyme, putative                            |
| 12 | AFLA_079390 | -     | hypothetical protein                                  |
| 12 | AFLA_079400 | -     | NRPS-like enzyme, putative                            |
| 12 | AFLA_079420 | -     | conserved hypothetical protein                        |
| 12 | AFLA_079440 | -     | allantoate permease, putative                         |
| 12 | AFLA_079460 | -     | DNA mismatch repair protein Msh1, putative            |
| 12 | AFLA_079360 | -4.14 | PKS-like enzyme, putative                             |
| 12 | AFLA_079430 | -3.82 | amidase, putative                                     |
| 12 | AFLA_079450 | -2.39 | ureidoglycolate hydrolase, putative                   |
| 12 | AFLA_079410 | -2.04 | MFS transporter, putative                             |
| 13 | AFLA_080490 | -     | polyketide synthase, putative                         |
| 13 | AFLA_080510 | -     | conserved hypothetical protein                        |
| 13 | AFLA_080550 | -     | conserved hypothetical protein                        |
| 13 | AFLA_080500 | -1.47 | cation-transporting ATPase, putative                  |
| 13 | AFLA_080480 | 1.10  | HD superfamily hydrolase, putative                    |
| 13 | AFLA_080520 | 1.46  | ADP-ribosylglycohydrolase family protein              |
| 13 | AFLA_080540 | 1.98  | DEAD box helicase Mph1, putative                      |
| 13 | AFLA_080470 | 3.03  | conserved hypothetical protein                        |

|    |             |       |                                                           |
|----|-------------|-------|-----------------------------------------------------------|
| 13 | AFLA_080530 | 3.07  | conserved hypothetical protein                            |
| 14 | AFLA_082050 | -     | epimerase/dehydratase family protein, putative            |
| 14 | AFLA_082060 | -     | conserved hypothetical protein                            |
| 14 | AFLA_082070 | -     | pantothenate transporter, putative                        |
| 14 | AFLA_082080 | -     | alpha/beta hydrolase, putative                            |
| 14 | AFLA_082090 | -     | conserved hypothetical protein                            |
| 14 | AFLA_082100 | -     | conserved hypothetical protein                            |
| 15 | AFLA_082150 | -     | polyketide synthase, putative                             |
| 15 | AFLA_082170 | -     | efflux pump antibiotic resistance protein, putative       |
| 15 | AFLA_082180 | -     | hypothetical protein                                      |
| 15 | AFLA_082190 | -     | conserved hypothetical protein                            |
| 15 | AFLA_082210 | 1.94  | conserved hypothetical protein                            |
| 15 | AFLA_082230 | 2.05  | pantothenate transporter, putative                        |
| 15 | AFLA_082160 | 2.47  | MFS glucose transporter, putative                         |
| 15 | AFLA_082220 | 2.70  | short-chain dehydrogenase, putative                       |
| 15 | AFLA_082200 | 4.14  | AAA family ATPase, putative                               |
| 16 | AFLA_082430 | -     | conserved hypothetical protein                            |
| 16 | AFLA_082440 | -     | conserved hypothetical protein                            |
| 16 | AFLA_082480 | -     | NRPS-like enzyme, putative                                |
| 16 | AFLA_082470 | 2.61  | AMP dependent CoA ligase, putative                        |
| 16 | AFLA_082450 | 3.29  | bicyclomycin resistance protein, putative                 |
| 16 | AFLA_082460 | 4.47  | conserved hypothetical protein                            |
| 17 | AFLA_083210 | -     | conserved hypothetical protein                            |
| 17 | AFLA_083220 | -     | ATP dependent RNA helicase (Rok1), putative               |
| 17 | AFLA_083230 | -     | mitochondrial F1F0-ATP synthase g subunit, putative       |
| 17 | AFLA_083260 | -     | hypothetical protein                                      |
| 17 | AFLA_083270 | 2.12  | GABA permease, putative                                   |
| 17 | AFLA_083250 | 2.43  | dimethylallyl tryptophan synthase, putative               |
| 17 | AFLA_083240 | 3.57  | xylitol dehydrogenase LadA/XdhB                           |
| 18 | AFLA_087830 | -     | DNA excision repair protein Rad2                          |
| 18 | AFLA_087850 | -     | conserved hypothetical protein                            |
| 18 | AFLA_087820 | -3.25 | cell wall integrity signaling protein Lsp1/Pil1, putative |
| 18 | AFLA_087840 | -1.43 | WD repeat protein                                         |
| 18 | AFLA_087810 | -1.07 | bZIP transcription factor, putative                       |
| 18 | AFLA_087860 | 1.80  | cellulose-binding GDSL lipase/acylhydrolase, putative     |
| 18 | AFLA_087870 | 3.02  | endoglucanase, putative                                   |
| 18 | AFLA_087880 | 5.24  | integral membrane protein                                 |
| 19 | AFLA_114820 | -     | polyketide synthase, putative                             |
| 19 | AFLA_114830 | -     | aminopeptidase, putative                                  |

|    |             |        |                                                    |
|----|-------------|--------|----------------------------------------------------|
| 19 | AFLA_114840 | -      | conserved hypothetical protein                     |
| 20 | AFLA_116140 | -      | putative secreted protein                          |
| 20 | AFLA_116230 | -      | conserved hypothetical protein                     |
| 20 | AFLA_116300 | -      | short-chain dehydrogenase, putative                |
| 20 | AFLA_116310 | -      | short-chain dehydrogenase, putative                |
| 20 | AFLA_116330 | -      | O-methyltransferase, putative                      |
| 20 | AFLA_116190 | -11.46 | conserved hypothetical protein                     |
| 20 | AFLA_116180 | -11.04 | hypothetical protein                               |
| 20 | AFLA_116170 | -10.67 | hypothetical protein                               |
| 20 | AFLA_116200 | -8.39  | conserved hypothetical protein                     |
| 20 | AFLA_116210 | -4.69  | O-methyltransferase, putative                      |
| 20 | AFLA_116290 | -3.47  | conserved hypothetical protein                     |
| 20 | AFLA_116280 | -3.36  | dihydroxy-acid dehydratase, putative               |
| 20 | AFLA_116270 | -3.06  | paraoxonase, putative                              |
| 20 | AFLA_116220 | -3.01  | polyketide synthase, putative                      |
| 20 | AFLA_116320 | -1.97  | hypothetical protein                               |
| 20 | AFLA_116150 | -1.67  | integral membrane protein                          |
| 20 | AFLA_116160 | 1.32   | zinc-binding dehydrogenase family oxidoreductase   |
| 20 | AFLA_116250 | 1.44   | conserved hypothetical protein                     |
| 20 | AFLA_116240 | 4.52   | hypothetical protein                               |
| 20 | AFLA_116260 | 5.58   | N-hydroxyarylamine O-acetyltransferase, putative   |
| 21 | AFLA_116840 | -      | salicylate 1-monooxygenase SalA                    |
| 21 | AFLA_116850 | -      | Ankyrin domain protein                             |
| 21 | AFLA_116880 | -      | C6 transcription factor, putative                  |
| 21 | AFLA_116900 | -      | conserved hypothetical protein                     |
| 21 | AFLA_116860 | -5.73  | alpha-N-acetylglucosaminidase, putative            |
| 21 | AFLA_116870 | -2.05  | transferase family protein                         |
| 21 | AFLA_116830 | -1.28  | hypothetical protein                               |
| 21 | AFLA_116890 | -1.02  | polyketide synthase, putative                      |
| 22 | AFLA_117770 | -      | DnaJ domain protein                                |
| 22 | AFLA_117780 | -      | farnesyl-diphosphate farnesyltransferase, putative |
| 22 | AFLA_117760 | 2.10   | phytase, putative                                  |
| 23 | AFLA_118440 | -4.87  | NRPS-like enzyme, putative                         |
| 23 | AFLA_118430 | -3.82  | conserved hypothetical protein                     |
| 24 | AFLA_118820 | -      | short-chain dehydrogenase, putative                |
| 24 | AFLA_118830 | -      | conserved hypothetical protein                     |
| 24 | AFLA_118860 | -      | hypothetical protein                               |
| 24 | AFLA_118870 | -      | translation initiation inhibitor, putative         |
| 24 | AFLA_118880 | -      | gibberellin 3-beta hydroxylase, putative           |

|    |             |       |                                                                       |
|----|-------------|-------|-----------------------------------------------------------------------|
| 24 | AFLA_118890 | -     | eukaryotic translation initiation factor eIF-5A-2                     |
| 24 | AFLA_118900 | -     | conserved hypothetical protein                                        |
| 24 | AFLA_118910 | -     | conserved hypothetical protein                                        |
| 24 | AFLA_118920 | -     | hypothetical protein                                                  |
| 24 | AFLA_118930 | -     | hypothetical protein                                                  |
| 24 | AFLA_118980 | -     | mitochondrial carrier protein Leu5                                    |
| 24 | AFLA_118840 | -4.41 | pantothenate transporter, putative                                    |
| 24 | AFLA_118850 | -3.61 | 2,4-dihydroxyhept-2-ene-1,7-dioic acid aldolase, putative             |
| 24 | AFLA_118940 | 1.18  | polyketide synthase, putative                                         |
| 24 | AFLA_118960 | 2.48  | polyketide synthase, putative                                         |
| 24 | AFLA_118970 | 3.45  | MAK1-like monooxygenase, putative                                     |
| 24 | AFLA_118950 | 4.67  | conserved hypothetical protein                                        |
| 24 | AFLA_118990 | 7.89  | efflux pump antibiotic resistance protein, putative                   |
| 25 | AFLA_119100 | -     | hypothetical protein                                                  |
| 25 | AFLA_119090 | -3.44 | oxidoreductase, short chain dehydrogenase/reductase family, putative  |
| 25 | AFLA_119120 | -3.25 | beta-lactamase family protein                                         |
| 25 | AFLA_119110 | -1.86 | NRPS-like enzyme, putative                                            |
| 25 | AFLA_119080 | -1.66 | hypothetical protein                                                  |
| 26 | AFLA_119750 | -     | riboflavin aldehyde-forming enzyme                                    |
| 26 | AFLA_119790 | -     | beta-xylosidase                                                       |
| 26 | AFLA_119810 | -     | sensory transduction histidine kinase bacterial, putative             |
| 26 | AFLA_119860 | -     | pectin lyase, putative                                                |
| 26 | AFLA_119870 | -     | iron-sulfur protein subunit of succinate dehydrogenase Sdh2, putative |
| 26 | AFLA_119850 | -2.57 | LsdA family protein                                                   |
| 26 | AFLA_119770 | -2.49 | conserved hypothetical protein                                        |
| 26 | AFLA_119780 | -2.14 | neutral protease 2 precursor, putative                                |
| 26 | AFLA_119880 | -1.51 | hypothetical protein                                                  |
| 26 | AFLA_119840 | -1.45 | hypothetical protein                                                  |
| 26 | AFLA_119760 | -1.13 | conserved hypothetical protein                                        |
| 26 | AFLA_119800 | 1.00  | conserved hypothetical protein                                        |
| 26 | AFLA_119820 | 1.59  | NRPS-like enzyme, putative                                            |
| 26 | AFLA_119830 | 2.66  | MFS multidrug transporter, putative                                   |
| 27 | AFLA_121400 | -     | hypothetical protein                                                  |
| 27 | AFLA_121410 | -     | hypothetical protein                                                  |
| 27 | AFLA_121420 | -     | hypothetical protein                                                  |
| 27 | AFLA_121430 | -     | conserved hypothetical protein                                        |
| 27 | AFLA_121440 | -     | fumarylacetoacetate hydrolase, putative                               |

|    |             |       |                                                                |
|----|-------------|-------|----------------------------------------------------------------|
| 27 | AFLA_121460 | -     | hypothetical protein                                           |
| 27 | AFLA_121470 | -     | hscarg dehydrogenase, putative                                 |
| 27 | AFLA_121540 | -     | MFS multidrug transporter, putative                            |
| 27 | AFLA_121580 | -     | C-4 methyl sterol oxidase, putative                            |
| 27 | AFLA_121590 | -3.55 | zinc-binding alcohol dehydrogenase, putative                   |
| 27 | AFLA_121450 | -2.35 | trihydroxytoluene oxygenase                                    |
| 27 | AFLA_121600 | -1.73 | conserved hypothetical protein                                 |
| 27 | AFLA_121550 | 1.94  | conserved hypothetical protein                                 |
| 27 | AFLA_121560 | 1.97  | conserved hypothetical protein                                 |
| 27 | AFLA_121570 | 2.40  | conserved hypothetical protein                                 |
| 27 | AFLA_121520 | 2.54  | NRPS-like enzyme, putative                                     |
| 27 | AFLA_121500 | 2.78  | cytochrome P450, putative                                      |
| 27 | AFLA_121490 | 2.81  | NmrA-like family protein                                       |
| 27 | AFLA_121530 | 2.87  | NADH-dependent flavin oxidoreductase, putative                 |
| 27 | AFLA_121480 | 3.14  | phytanoyl-CoA dioxygenase family protein                       |
| 27 | AFLA_121510 | 3.53  | conserved hypothetical protein                                 |
| 28 | AFLA_089620 | -     | chalcone synthase, putative                                    |
| 28 | AFLA_089630 | -     | choline transport protein, putative                            |
| 28 | AFLA_089640 | -     | conserved hypothetical protein                                 |
| 28 | AFLA_089650 | -     | high-affinity iron transporter FtrA                            |
| 28 | AFLA_089660 | -     | ferrooxidoreductase Fet3, putative                             |
| 28 | AFLA_089670 | -3.14 | ferric reductase transmembrane component 4 precursor, putative |
| 29 | AFLA_090190 | -     | dimethylallyl tryptophan synthase, putative                    |
| 29 | AFLA_090200 | -     | nonribosomal peptide synthase, putative                        |
| 29 | AFLA_090180 | 3.80  | alpha/beta hydrolase, putative                                 |
| 30 | AFLA_090590 | -     | alpha-1,2-mannosidase, putative subfamily                      |
| 30 | AFLA_090600 | -     | conserved hypothetical protein                                 |
| 30 | AFLA_090610 | -     | hypothetical protein                                           |
| 30 | AFLA_090620 | -     | hypothetical protein                                           |
| 30 | AFLA_090630 | -     | cytochrome P450, putative                                      |
| 30 | AFLA_090640 | -     | geranyl geranyl pyrophosphate synthase, putative               |
| 30 | AFLA_090660 | -     | conserved hypothetical protein                                 |
| 30 | AFLA_090650 | -1.23 | DUF1115 domain protein                                         |
| 30 | AFLA_090670 | 1.11  | hypothetical protein                                           |
| 30 | AFLA_090680 | 1.92  | cytochrome P450, putative                                      |
| 30 | AFLA_090690 | 2.38  | mycelial catalase Cat1                                         |
| 31 | AFLA_096340 | -     | hypothetical protein                                           |
| 31 | AFLA_096350 | -     | TrkA-N domain dehydrogenase, putative                          |

|    |             |       |                                                         |
|----|-------------|-------|---------------------------------------------------------|
| 31 | AFLA_096390 | -     | prenyl transferase AtmC                                 |
| 31 | AFLA_096400 | -     | FAD-dependent monooxygenase AtmM                        |
| 31 | AFLA_096430 | -     | cytochrome P450, putative                               |
| 31 | AFLA_096410 | -3.01 | PTH11-like integral membrane protein, putative          |
| 31 | AFLA_096330 | -2.40 | C6 and C2H2 transcription factor                        |
| 31 | AFLA_096420 | -1.66 | hypothetical protein                                    |
| 31 | AFLA_096370 | 2.41  | Zn2Cys6 transcription factor                            |
| 31 | AFLA_096360 | 3.83  | hypothetical protein                                    |
| 31 | AFLA_096380 | 4.42  | FAD dependent oxidoreductase, putative                  |
| 32 | AFLA_096700 | -     | NRPS-like enzyme, putative                              |
| 32 | AFLA_096710 | -     | NRPS-like enzyme, putative                              |
| 32 | AFLA_096720 | -     | hypothetical protein                                    |
| 32 | AFLA_096730 | -     | conserved hypothetical protein                          |
| 32 | AFLA_096770 | -     | polyketide synthase, putative                           |
| 32 | AFLA_096740 | -8.85 | monooxygenase, putative                                 |
| 32 | AFLA_096760 | -7.35 | monocarboxylate transporter, putative                   |
| 32 | AFLA_096750 | -5.37 | cytochrome P450, putative                               |
| 33 | AFLA_017840 | -     | NRPS-like enzyme, putative                              |
| 33 | AFLA_017850 | -4.85 | conserved hypothetical protein                          |
| 33 | AFLA_017860 | -2.98 | hypothetical protein                                    |
| 34 | AFLA_018250 | -     | conserved hypothetical protein                          |
| 34 | AFLA_018270 | -     | hypothetical protein                                    |
| 34 | AFLA_018280 | -     | mitochondrial outer membrane protein (Sam35), putative  |
| 34 | AFLA_018290 | -     | conserved hypothetical protein                          |
| 34 | AFLA_018300 | -     | cell division control protein 14                        |
| 34 | AFLA_018310 | -     | geranylgeranyl diphosphate synthase                     |
| 34 | AFLA_018320 | -     | Smr domain protein                                      |
| 34 | AFLA_018340 | -     | G-protein complex alpha subunit GpaA/FadA               |
| 34 | AFLA_018260 | -1.42 | DUF543 domain protein                                   |
| 34 | AFLA_018350 | 1.72  | conserved hypothetical protein                          |
| 34 | AFLA_018330 | 3.00  | hypothetical protein                                    |
| 35 | AFLA_038600 | -1.10 | nonribosomal peptide synthase, putative                 |
| 35 | AFLA_038590 | 3.93  | Ankyrin repeat protein                                  |
| 35 | AFLA_038580 | 4.10  | RTA1 domain protein                                     |
| 35 | AFLA_038570 | 4.44  | malonyl CoA-acyl carrier protein transacylase, putative |
| 36 | AFLA_039200 | -     | cytochrome P450, putative                               |
| 36 | AFLA_039210 | -     | cytochrome P450, putative                               |
| 36 | AFLA_039220 | -     | cytochrome P450, putative                               |
| 36 | AFLA_039230 | -     | short-chain dehydrogenase, putative                     |

|    |             |       |                                                                     |
|----|-------------|-------|---------------------------------------------------------------------|
| 36 | AFLA_039240 | -     | aristolochene synthase, putative                                    |
| 36 | AFLA_039270 | -     | carboxylesterase, putative                                          |
| 36 | AFLA_039260 | 2.02  | esterase, putative                                                  |
| 36 | AFLA_039250 | 2.04  | hypothetical protein                                                |
| 37 | AFLA_041590 | -     | peroxisomal multifunctional beta-oxidation protein (MFP), putative  |
| 37 | AFLA_041600 | -     | RING finger protein (Zin), putative                                 |
| 37 | AFLA_041610 | -     | NRPS-like enzyme, putative                                          |
| 37 | AFLA_041620 | 3.61  | aquaporin, putative                                                 |
| 38 | AFLA_042330 | -     | conserved hypothetical protein                                      |
| 38 | AFLA_042340 | -     | conserved hypothetical protein                                      |
| 38 | AFLA_042350 | -     | conserved hypothetical protein                                      |
| 38 | AFLA_042360 | -     | hypothetical protein                                                |
| 38 | AFLA_042370 | -     | conserved hypothetical protein                                      |
| 39 | AFLA_045490 | -     | dimethylallyl tryptophan synthase, putative                         |
| 39 | AFLA_045510 | -     | integral membrane protein                                           |
| 39 | AFLA_045500 | 4.36  | cytochrome P450, putative                                           |
| 40 | AFLA_100320 | -     | hypothetical protein                                                |
| 40 | AFLA_100330 | -     | FAD dependent oxidoreductase, putative                              |
| 40 | AFLA_100340 | -     | nonribosomal peptide synthase, putative                             |
| 40 | AFLA_100360 | -     | amino acid transporter, putative                                    |
| 40 | AFLA_100370 | -     | acetylornithine aminotransferase, putative                          |
| 40 | AFLA_100380 | -     | hypothetical protein                                                |
| 40 | AFLA_100390 | -     | conserved hypothetical protein                                      |
| 40 | AFLA_100400 | -     | hypothetical protein                                                |
| 40 | AFLA_100410 | -     | hypothetical protein                                                |
| 40 | AFLA_100420 | -     | amidase, putative                                                   |
| 40 | AFLA_100270 | -2.06 | aliphatic nitrilase, putative                                       |
| 40 | AFLA_100280 | -1.96 | MFS transporter, putative                                           |
| 40 | AFLA_100310 | -1.94 | oxidoreductase, putative                                            |
| 40 | AFLA_100300 | -1.44 | C6 transcription factor, putative                                   |
| 40 | AFLA_100290 | -1.43 | aliphatic nitrilase, putative                                       |
| 40 | AFLA_100350 | 3.46  | conserved hypothetical protein                                      |
| 41 | AFLA_101740 | -6.59 | glycerophosphoinositol/ glycerophosphocholine transporter, putative |
| 41 | AFLA_101750 | -5.66 | molybdopterin synthase small subunit CnxG                           |
| 41 | AFLA_101760 | -4.09 | molybdenum cofactor biosynthesis protein Gephyrin, putative         |
| 41 | AFLA_101720 | 1.27  | cytochrome P450, putative                                           |
| 41 | AFLA_101730 | 2.08  | ferulate-5-hydroxylase, putative                                    |

|    |             |       |                                                   |
|----|-------------|-------|---------------------------------------------------|
| 41 | AFLA_101700 | 2.24  | NRPS-like enzyme, putative                        |
| 41 | AFLA_101710 | 2.37  | NmrA-like family protein                          |
| 41 | AFLA_101690 | 3.10  | alcohol dehydrogenase, putative                   |
| 42 | AFLA_102110 | -     | conserved hypothetical protein                    |
| 42 | AFLA_102150 | -     | SAM dependent methyltransferase, putative         |
| 42 | AFLA_102140 | 1.24  | conserved hypothetical protein                    |
| 42 | AFLA_102120 | 1.25  | hypothetical protein                              |
| 42 | AFLA_102160 | 2.89  | lanosterol synthase, putative                     |
| 42 | AFLA_102130 | 3.34  | conserved hypothetical protein                    |
| 43 | AFLA_102480 | -     | isoamyl alcohol oxidase                           |
| 43 | AFLA_102490 | -     | conserved hypothetical protein                    |
| 43 | AFLA_102500 | -     | 9-cis-epoxycarotenoid dioxygenase, putative       |
| 43 | AFLA_102520 | -     | phytoene dehydrogenase, putative                  |
| 43 | AFLA_102530 | -     | UMTA methyltransferase family protein             |
| 43 | AFLA_102540 | -     | hypothetical protein                              |
| 43 | AFLA_102550 | -     | G-patch domain protein, putative                  |
| 43 | AFLA_102510 | 2.71  | phytoene synthase, putative                       |
| 44 | AFLA_064250 | -     | phenol 2-monooxygenase, putative                  |
| 44 | AFLA_064270 | -     | gibberellin 2-oxidase, putative                   |
| 44 | AFLA_064280 | -     | N-methyltransferase, putative                     |
| 44 | AFLA_064290 | -     | O-methyltransferase, putative                     |
| 44 | AFLA_064300 | -     | fructosyl amino acid oxidase, putative            |
| 44 | AFLA_064330 | -     | conserved hypothetical protein                    |
| 44 | AFLA_064340 | -     | conserved hypothetical protein                    |
| 44 | AFLA_064260 | -1.01 | oligopeptide transporter, putative                |
| 44 | AFLA_064320 | 1.16  | oligopeptide transporter, putative                |
| 44 | AFLA_064310 | 1.21  | hypothetical protein                              |
| 44 | AFLA_064240 | 1.54  | nonribosomal peptide synthase, putative           |
| 45 | AFLA_064510 | -     | thioredoxin reductase GliT-like, putative         |
| 45 | AFLA_064520 | -     | O-methyltransferase GliM-like, putative           |
| 45 | AFLA_064610 | -     | short-chain oxidoreductase, putative              |
| 45 | AFLA_064630 | -     | hypothetical protein                              |
| 45 | AFLA_064560 | -1.39 | nonribosomal peptide synthase GliP-like, putative |
| 45 | AFLA_064620 | -1.00 | conserved hypothetical protein                    |
| 45 | AFLA_064500 | 1.33  | conserved hypothetical protein                    |
| 45 | AFLA_064580 | 2.12  | oxidoreductase, putative                          |
| 45 | AFLA_064570 | 2.17  | uracil permease, putative                         |
| 45 | AFLA_064540 | 2.31  | cytochrome P450 oxidoreductase GliC               |
| 45 | AFLA_064600 | 2.34  | conserved hypothetical protein                    |

|    |             |       |                                                                |
|----|-------------|-------|----------------------------------------------------------------|
| 45 | AFLA_064550 | 2.53  | membrane dipeptidase GliJ-like, putative                       |
| 45 | AFLA_064530 | 2.63  | glutathione S-transferase GliG-like, putative                  |
| 45 | AFLA_064460 | 2.88  | conserved hypothetical protein                                 |
| 45 | AFLA_064440 | 3.02  | transport protein, putative                                    |
| 45 | AFLA_064590 | 3.17  | O-methyltransferase, putative                                  |
| 45 | AFLA_064480 | 3.28  | conserved hypothetical protein                                 |
| 45 | AFLA_064470 | 3.31  | cytochrome P450, putative                                      |
| 45 | AFLA_064450 | 3.74  | aminotransferase GliI-like, putative                           |
| 45 | AFLA_064490 | 3.82  | conserved hypothetical protein                                 |
| 45 | AFLA_064640 | 4.45  | oxidoreductase, short-chain dehydrogenase/reductase family     |
| 46 | AFLA_066730 | -2.68 | alcohol dehydrogenase, putative                                |
| 46 | AFLA_066710 | 1.68  | conserved hypothetical protein                                 |
| 46 | AFLA_066700 | 2.27  | P450 family sporulation-specific N-formyltyrosine oxidase Dit2 |
| 46 | AFLA_066720 | 2.34  | nonribosomal peptide synthase, putative                        |
| 47 | AFLA_066840 | -     | hybrid PKS/NRPS enzyme, putative                               |
| 47 | AFLA_066850 | -     | conserved hypothetical protein                                 |
| 47 | AFLA_066860 | -     | conserved hypothetical protein                                 |
| 47 | AFLA_066870 | -     | conserved hypothetical protein                                 |
| 47 | AFLA_066900 | -1.60 | conserved hypothetical protein                                 |
| 47 | AFLA_066970 | 1.28  | conserved hypothetical protein                                 |
| 47 | AFLA_066890 | 1.36  | cytochrome P450, putative                                      |
| 47 | AFLA_066950 | 2.04  | conserved hypothetical protein                                 |
| 47 | AFLA_066880 | 2.08  | monocarboxylate transporter, putative                          |
| 47 | AFLA_066920 | 2.36  | alcohol dehydrogenase, putative                                |
| 47 | AFLA_066910 | 2.48  | conserved hypothetical protein                                 |
| 47 | AFLA_066960 | 3.82  | hypothetical protein                                           |
| 47 | AFLA_066930 | 3.86  | cytochrome P450, putative                                      |
| 47 | AFLA_066940 | 4.39  | O-methyltransferase, putative                                  |
| 48 | AFLA_069340 | -2.33 | MSF drug transporter, putative                                 |
| 48 | AFLA_069350 | -1.42 | conserved hypothetical protein                                 |
| 48 | AFLA_069330 | 1.19  | nonribosomal peptide synthase Pes1                             |
| 49 | AFLA_070860 | -     | ACV synthetase PcbAB                                           |
| 49 | AFLA_070900 | -     | conserved hypothetical protein                                 |
| 49 | AFLA_070920 | -     | NRPS-like enzyme, putative                                     |
| 49 | AFLA_070890 | -3.79 | hypothetical protein                                           |
| 49 | AFLA_070870 | 1.52  | isopenicillin N synthetase PcbC                                |
| 49 | AFLA_070910 | 1.79  | aminotransferase, putative                                     |

|    |             |        |                                                       |
|----|-------------|--------|-------------------------------------------------------|
| 49 | AFLA_070880 | 3.90   | acyl-coenzyme A:Isopenicillin N acyltransferase PenDE |
| 50 | AFLA_002910 | -      | conserved hypothetical protein                        |
| 50 | AFLA_002930 | -      | hypothetical protein                                  |
| 50 | AFLA_002920 | -4.66  | flavonoid 3-hydroxylase, putative                     |
| 50 | AFLA_002890 | -1.06  | AMP-binding enzyme family protein                     |
| 50 | AFLA_002900 | 2.44   | polyketide synthase, putative                         |
| 51 | AFLA_004280 | -      | C6 transcription factor, putative                     |
| 51 | AFLA_004290 | -      | conserved hypothetical protein                        |
| 51 | AFLA_004300 | -5.05  | prenyltransferase, putative                           |
| 52 | AFLA_004440 | -10.38 | ABC multidrug transporter, putative                   |
| 52 | AFLA_004430 | -7.35  | conserved hypothetical protein                        |
| 52 | AFLA_004450 | -6.59  | nonribosomal peptide synthase, putative               |
| 53 | AFLA_005270 | -      | conserved hypothetical protein                        |
| 53 | AFLA_005280 | -      | hypothetical protein                                  |
| 53 | AFLA_005300 | -      | ankyrin repeat-containing protein, putative           |
| 53 | AFLA_005320 | -      | polyketide synthase, putative                         |
| 53 | AFLA_005330 | -      | conserved hypothetical protein                        |
| 53 | AFLA_005340 | -      | conserved hypothetical protein                        |
| 53 | AFLA_005350 | -      | hypothetical protein                                  |
| 53 | AFLA_005360 | -      | conserved hypothetical protein                        |
| 53 | AFLA_005380 | -      | hypothetical protein                                  |
| 53 | AFLA_005400 | -      | ankyrin repeat-containing protein, putative           |
| 53 | AFLA_005390 | -3.83  | conserved hypothetical protein                        |
| 53 | AFLA_005290 | -1.14  | conserved hypothetical protein                        |
| 53 | AFLA_005410 | -1.05  | 5-AMP-activated protein kinase, putative              |
| 53 | AFLA_005310 | 5.04   | vacuolar ATP synthase proteolipid subunit, putative   |
| 53 | AFLA_005370 | 5.80   | conserved hypothetical protein                        |
| 54 | AFLA_005440 | -1.70  | nonribosomal peptide synthase, putative               |
| 54 | AFLA_005450 | 1.33   | conserved hypothetical protein                        |
| 55 | AFLA_006110 | -      | conserved hypothetical protein                        |
| 55 | AFLA_006130 | -      | NADH pyrophosphatase, putative                        |
| 55 | AFLA_006140 | -      | conserved hypothetical protein                        |
| 55 | AFLA_006150 | -      | flavin dependent monooxygenase, putative              |
| 55 | AFLA_006160 | -      | HDA1 complex subunit, putative                        |
| 55 | AFLA_006180 | -      | conidial pigment biosynthesis oxidase Arb2/brown2     |
| 55 | AFLA_006190 | -      | multicopper oxidase, putative                         |
| 55 | AFLA_006240 | -      | PHD transcription factor (Rum1), putative             |
| 55 | AFLA_006170 | -5.70  | polyketide synthetase PksP                            |
| 55 | AFLA_006100 | -2.45  | HypA-like protein, putative                           |

|    |             |       |                                                           |
|----|-------------|-------|-----------------------------------------------------------|
| 55 | AFLA_006230 | -1.88 | 1-aminocyclopropane-1-carboxylate deaminase, putative     |
| 55 | AFLA_006120 | -1.26 | glutamine dependent NAD <sup>+</sup> synthetase, putative |
| 55 | AFLA_006220 | -1.22 | exopolyphosphatase, putative                              |
| 55 | AFLA_006210 | 1.43  | SH3 domain protein (Cyk3), putative                       |
| 55 | AFLA_006200 | 3.15  | hypothetical protein                                      |
| 56 | AFLA_006800 | -     | DNA damage repair protein (Rad9), putative                |
| 56 | AFLA_006810 | -     | 50S ribosomal protein L27, putative                       |
| 56 | AFLA_006830 | -     | scramblase family protein                                 |
| 56 | AFLA_006860 | -     | oxidosqualene:lanosterol cyclase                          |
| 56 | AFLA_006870 | -     | SGT1 and CS domain protein                                |
| 56 | AFLA_006900 | -     | cyclin-dependent protein kinase PhoA                      |
| 56 | AFLA_006920 | -3.09 | cAMP receptor-like protein, putative                      |
| 56 | AFLA_006880 | -2.68 | PQ loop repeat protein                                    |
| 56 | AFLA_006890 | -1.82 | SIR2 family histone deacetylase, putative                 |
| 56 | AFLA_006840 | -1.39 | ubiquitin conjugating enzyme (UbcH), putative             |
| 56 | AFLA_006850 | 1.02  | meiosis-specific topoisomerase Spo11, putative            |
| 56 | AFLA_006820 | 1.64  | conserved hypothetical protein                            |
| 56 | AFLA_006910 | 2.74  | hypothetical protein                                      |
| 57 | AFLA_135430 | -     | cytochrome P450, putative                                 |
| 57 | AFLA_135440 | -     | cytochrome P450, putative                                 |
| 57 | AFLA_135450 | -     | trichodiene synthase, putative                            |
| 57 | AFLA_135470 | -     | ornithine decarboxylase, putative                         |
| 57 | AFLA_135480 | -     | galactose-proton symport, putative                        |
| 57 | AFLA_135490 | -     | nonribosomal peptide synthase, putative                   |
| 57 | AFLA_135460 | -1.66 | conserved hypothetical protein                            |
| 58 | AFLA_137790 | -     | cell wall protein, putative                               |
| 58 | AFLA_137800 | -     | conserved hypothetical protein                            |
| 58 | AFLA_137810 | -     | pantothenate transporter, putative                        |
| 58 | AFLA_137890 | -     | conserved hypothetical protein                            |
| 58 | AFLA_137880 | 1.22  | extracellular triacylglycerol lipase, putative            |
| 58 | AFLA_137830 | 1.77  | hypothetical protein                                      |
| 58 | AFLA_137780 | 2.50  | ABC transporter, putative                                 |
| 58 | AFLA_137820 | 2.92  | conserved hypothetical protein                            |
| 58 | AFLA_137840 | 4.15  | integral membrane protein                                 |
| 58 | AFLA_137870 | 5.11  | polyketide synthase, putative                             |
| 58 | AFLA_137850 | 5.50  | conserved hypothetical protein                            |
| 58 | AFLA_137860 | 5.64  | conserved hypothetical protein                            |
| 59 | AFLA_139160 | -     | aflX/ ordB/ monooxygenase/ oxidase                        |
| 59 | AFLA_139180 | -     | aflV/ cypX/ cytochrome P450 monooxygenase                 |

|    |             |       |                                                                  |
|----|-------------|-------|------------------------------------------------------------------|
| 59 | AFLA_139190 | -     | aflK/ vbs/ VERB synthase                                         |
| 59 | AFLA_139200 | -     | aflQ/ ordA/ ord-1/ oxidoreductase/ cytochrome P450 monooxygenase |
| 59 | AFLA_139210 | -     | aflP/ omtA/ omt-1/ O-methyltransferase A                         |
| 59 | AFLA_139220 | -     | aflO/ omtB/ dmtA/ O-methyltransferase B                          |
| 59 | AFLA_139230 | -     | aflI/ avfA/ cytochrome P450 monooxygenase                        |
| 59 | AFLA_139250 | -     | aflL/ verB/ desaturase/ P450 monooxygenase                       |
| 59 | AFLA_139260 | -     | aflG/ avnA/ ord-1/ cytochrome P450 monooxygenase                 |
| 59 | AFLA_139280 | -     | aflN/ verA/ monooxygenase                                        |
| 59 | AFLA_139300 | -     | aflM/ ver-1/ dehydrogenase/ ketoreductase                        |
| 59 | AFLA_139310 | -     | aflE/ norA/ aad/ adh-2/ NOR reductase/ dehydrogenase             |
| 59 | AFLA_139320 | -     | aflJ/ estA/ esterase                                             |
| 59 | AFLA_139330 | -     | aflH/ adhA/ short chain alcohol dehydrogenase                    |
| 59 | AFLA_139390 | -     | aflD / nor-1 / reductase                                         |
| 59 | AFLA_139400 | -     | aflCa / hypC / hypothetical protein                              |
| 59 | AFLA_139440 | -     | aflF / norB / dehydrogenase                                      |
| 59 | AFLA_139340 | -3.16 | aflS/ pathway regulator                                          |
| 59 | AFLA_139360 | -2.99 | aflR / apa-2 / afl-2 / transcription activator                   |
| 59 | AFLA_139380 | -2.57 | aflA / fas-2 / hexA / fatty acid synthase alpha subunit          |
| 59 | AFLA_139150 | 1.16  | aflY/ hypA/ hypP/ hypothetical protein                           |
| 59 | AFLA_139370 | 1.47  | aflB / fas-1 / fatty acid synthase beta subunit                  |
| 59 | AFLA_139410 | 2.00  | aflC / pksA / pksL1 / polyketide synthase                        |
| 59 | AFLA_139170 | 2.05  | aflW/ moxY/ monooxygenase                                        |
| 59 | AFLA_139420 | 2.73  | aflT / aflT / transmembrane protein                              |
| 59 | AFLA_139430 | 4.24  | aflU / cypA / P450 monooxygenase                                 |
| 60 | AFLA_139590 | -     | choline dehydrogenase, putative                                  |
| 60 | AFLA_139600 | -     | glucose-methanol-choline (gmc) oxidoreductase, putative          |
| 60 | AFLA_139620 | -     | amino acid permease family protein                               |
| 60 | AFLA_139630 | -     | ABC multidrug transporter, putative                              |
| 60 | AFLA_139640 | -     | hypothetical protein                                             |
| 60 | AFLA_139650 | -     | hypothetical protein                                             |
| 60 | AFLA_139660 | -     | hypothetical protein                                             |
| 60 | AFLA_139670 | -     | nonribosomal peptide synthase, putative                          |
| 60 | AFLA_139610 | 1.75  | ceramidase, putative                                             |
| 61 | AFLA_022840 | -     | allantoate permease, putative                                    |
| 61 | AFLA_022850 | -     | conserved hypothetical protein                                   |
| 61 | AFLA_022870 | -     | conserved hypothetical protein                                   |
| 61 | AFLA_023000 | -     | Ankyrin domain protein                                           |
| 61 | AFLA_023010 | -     | GA4 desaturase family protein                                    |

|    |             |       |                                                        |
|----|-------------|-------|--------------------------------------------------------|
| 61 | AFLA_023030 | -     | cytochrome P450 oxidoreductase GliC-like, putative     |
| 61 | AFLA_023040 | -     | C6 transcription factor, putative                      |
| 61 | AFLA_023060 | -     | hypothetical protein                                   |
| 61 | AFLA_023080 | -     | integral membrane protein TmpA                         |
| 61 | AFLA_023070 | -2.93 | integral membrane protein                              |
| 61 | AFLA_022990 | -1.83 | conserved hypothetical protein                         |
| 61 | AFLA_022880 | -1.54 | oligopeptide transporter, putative                     |
| 61 | AFLA_022860 | 1.73  | hypothetical protein                                   |
| 61 | AFLA_023050 | 1.99  | MFS transporter, putative                              |
| 61 | AFLA_023020 | 4.15  | NRPS-like enzyme, putative                             |
| 62 | AFLA_027210 | -     | conserved hypothetical protein                         |
| 62 | AFLA_027220 | -     | hypothetical protein                                   |
| 62 | AFLA_027230 | -     | alpha-aminoadipate reductase Lys2, putative            |
| 62 | AFLA_027250 | -     | aldo-keto reductase, putative                          |
| 62 | AFLA_027260 | -     | conserved hypothetical protein                         |
| 62 | AFLA_027200 | 1.28  | xanthine dehydrogenase HxA, putative                   |
| 62 | AFLA_027240 | 1.58  | carbonic anhydrase Nce103, putative                    |
| 63 | AFLA_028730 | -     | conserved hypothetical protein                         |
| 63 | AFLA_028740 | -     | coenzyme A transferase, putative                       |
| 63 | AFLA_028760 | -1.30 | C2H2 transcription factor, putative                    |
| 63 | AFLA_028720 | -1.20 | NRPS-like enzyme, putative                             |
| 63 | AFLA_028710 | 2.28  | short chain type dehydrogenase, putative               |
| 63 | AFLA_028750 | 2.49  | UMTA methyltransferase family protein                  |
| 64 | AFLA_105000 | -     | DUF636 domain protein                                  |
| 64 | AFLA_105040 | -     | conserved hypothetical protein                         |
| 64 | AFLA_105060 | -     | NAD dependent epimerase/dehydratase, putative          |
| 64 | AFLA_105080 | -     | terpene synthase family protein                        |
| 64 | AFLA_105030 | -2.57 | cytosine deaminase, putative                           |
| 64 | AFLA_105010 | -2.53 | methyltransferase, putative                            |
| 64 | AFLA_105020 | -1.54 | conserved hypothetical protein                         |
| 64 | AFLA_105050 | -1.45 | geranylgeranyl pyrophosphate synthetase AtmG, putative |
| 64 | AFLA_105070 | -1.13 | cytochrome P450 oxygenase, putative                    |
| 65 | AFLA_105130 | -     | conserved hypothetical protein                         |
| 65 | AFLA_105140 | -     | conserved hypothetical protein                         |
| 65 | AFLA_105150 | -     | extracellular carboxylesterase, putative               |
| 65 | AFLA_105160 | -     | hypothetical protein                                   |
| 65 | AFLA_105190 | -4.46 | NRPS-like enzyme, putative                             |
| 65 | AFLA_105180 | -2.54 | hypothetical protein                                   |
| 65 | AFLA_105170 | -2.39 | O-methyltransferase, putative                          |

|    |             |       |                                                              |
|----|-------------|-------|--------------------------------------------------------------|
| 65 | AFLA_105120 | -1.50 | GNAT family acetyltransferase, putative                      |
| 66 | AFLA_105370 | -     | conserved hypothetical protein                               |
| 66 | AFLA_105380 | -     | actin-binding protein, putative                              |
| 66 | AFLA_105400 | -     | kinesin family protein (KlpA), putative                      |
| 66 | AFLA_105440 | -     | cytochrome P450, putative                                    |
| 66 | AFLA_105450 | -     | polyketide synthase, putative                                |
| 66 | AFLA_105460 | -     | conserved hypothetical protein                               |
| 66 | AFLA_105490 | -     | phosphoribulokinase/uridine kinase family protein            |
| 66 | AFLA_105480 | -5.35 | DUF636 domain protein                                        |
| 66 | AFLA_105470 | -3.91 | translation initiation factor eIF-2B subunit family protein  |
| 66 | AFLA_105540 | -2.34 | MFS multidrug transporter, putative                          |
| 66 | AFLA_105530 | -2.27 | C6 transcription factor, putative                            |
| 66 | AFLA_105390 | -1.20 | conserved hypothetical protein                               |
| 66 | AFLA_105520 | 1.07  | conserved hypothetical protein                               |
| 66 | AFLA_105510 | 1.33  | conserved hypothetical protein                               |
| 66 | AFLA_105430 | 1.37  | fatty acid desaturase protein, putative                      |
| 66 | AFLA_105410 | 1.97  | thioester reductase family protein, putative                 |
| 66 | AFLA_105420 | 2.16  | hypothetical protein                                         |
| 66 | AFLA_105500 | 4.17  | conserved hypothetical protein                               |
| 67 | AFLA_107100 | -     | conserved hypothetical protein                               |
| 67 | AFLA_107120 | -     | conserved hypothetical protein                               |
| 67 | AFLA_107130 | -     | D-isomer specific 2-hydroxyacid dehydrogenase family protein |
| 67 | AFLA_107140 | -     | conserved hypothetical protein                               |
| 67 | AFLA_107110 | -1.93 | conserved hypothetical protein                               |
| 67 | AFLA_107150 | 1.94  | conserved hypothetical protein                               |
| 68 | AFLA_108540 | -     | NADH oxidase, putative                                       |
| 68 | AFLA_108550 | -     | polyketide synthase, putative                                |
| 68 | AFLA_108560 | -     | O-methyltransferase, putative                                |
| 68 | AFLA_108570 | -     | conserved hypothetical protein                               |
| 68 | AFLA_108580 | -     | cytochrome P450, putative                                    |
| 69 | AFLA_109390 | -     | conserved hypothetical protein                               |
| 69 | AFLA_109400 | -     | extracellular protein, putative                              |
| 69 | AFLA_109410 | -     | UV-endonuclease UVE-1                                        |
| 69 | AFLA_109420 | -     | actin cytoskeleton organization protein App1, putative       |
| 69 | AFLA_109440 | -     | long-chain-fatty-acid-CoA ligase, putative                   |
| 69 | AFLA_109380 | -2.84 | alcohol dehydrogenase, putative                              |
| 69 | AFLA_109430 | 4.23  | nonribosomal siderophore peptide synthase SidC               |
| 70 | AFLA_112780 | -     | conserved hypothetical protein                               |

|    |             |       |                                                               |
|----|-------------|-------|---------------------------------------------------------------|
| 70 | AFLA_112790 | -     | acyl-CoA thioester hydrolase, putative                        |
| 70 | AFLA_112810 | -     | tryptophan synthase alpha subunit, putative                   |
| 70 | AFLA_112820 | -     | toxin biosynthesis ketoreductase, putative                    |
| 70 | AFLA_112830 | -     | conserved hypothetical protein                                |
| 70 | AFLA_112840 | -     | polyketide synthase, putative                                 |
| 70 | AFLA_112880 | -     | 2,4-dichlorophenol 6-monooxygenase, putative                  |
| 70 | AFLA_112900 | -     | epoxide hydrolase, putative                                   |
| 70 | AFLA_112910 | -     | conserved hypothetical protein                                |
| 70 | AFLA_112920 | -     | mitochondrial cytochrome b2-like, putative                    |
| 70 | AFLA_112800 | -4.33 | L-lactate dehydrogenase                                       |
| 70 | AFLA_112870 | 1.11  | monooxygenase, putative                                       |
| 70 | AFLA_112890 | 1.30  | MFS transporter, putative                                     |
| 70 | AFLA_112860 | 1.82  | conserved hypothetical protein                                |
| 70 | AFLA_112850 | 3.07  | O-methyltransferase, putative                                 |
| 71 | AFLA_059980 | 3.75  | choline dehydrogenase, putative                               |
| 71 | AFLA_060020 | 4.04  | PKS-like enzyme, putative                                     |
| 71 | AFLA_059960 | 4.33  | conserved hypothetical protein                                |
| 71 | AFLA_059970 | 4.65  | short-chain dehydrogenase, putative                           |
| 71 | AFLA_059990 | 4.88  | O-methyltransferase, putative                                 |
| 71 | AFLA_060000 | 5.07  | metallo-beta-lactamase domain protein                         |
| 71 | AFLA_060010 | 5.88  | PKS-like enzyme, putative                                     |
| 71 | AFLA_059950 | 7.37  | oxidoreductase, FAD-binding, putative                         |
| 72 | AFLA_060650 | -     | glutaminyl-tRNA synthetase                                    |
| 72 | AFLA_060660 | -     | AMP-binding enzyme, putative                                  |
| 72 | AFLA_060670 | -     | integral membrane protein                                     |
| 72 | AFLA_060680 | 1.60  | conserved hypothetical protein                                |
| 73 | AFLA_062440 | -     | conserved hypothetical protein                                |
| 73 | AFLA_062450 | -     | sphingomyelin phosphodiesterase, putative                     |
| 73 | AFLA_062460 | -     | non-classical export protein Nce102, putative                 |
| 73 | AFLA_062470 | -     | pentalenene synthase, putative                                |
| 73 | AFLA_062480 | -     | conserved hypothetical protein                                |
| 73 | AFLA_062500 | -     | mitogen-activated protein kinase MAF1                         |
| 73 | AFLA_062510 | -     | myosin heavy chain, embryonic smooth muscle isoform, putative |
| 73 | AFLA_062520 | -     | COPII-coated vesicle protein (Erv41), putative                |
| 73 | AFLA_062430 | -5.13 | non-classical export protein Nce102, putative                 |
| 73 | AFLA_062490 | 1.25  | COPII-coated vesicle protein (Erv41), putative                |
| 74 | AFLA_062830 | -     | monooxygenase, putative                                       |
| 74 | AFLA_062870 | -     | conserved hypothetical protein                                |

|    |                    |       |                                                    |
|----|--------------------|-------|----------------------------------------------------|
| 74 | <b>AFLA_062880</b> | -     | short chain dehydrogenase/oxidoreductase, putative |
| 74 | <b>AFLA_062890</b> | -     | hypothetical protein                               |
| 74 | <b>AFLA_062900</b> | -     | glycerol-3-phosphate O-acyltransferase, putative   |
| 74 | <b>AFLA_062910</b> | -     | proline-specific permease, putative                |
| 74 | <b>AFLA_062920</b> | -     | conserved hypothetical protein                     |
| 74 | <b>AFLA_062930</b> | -     | glycosyl hydrolase, family 43, putative            |
| 74 | <b>AFLA_062840</b> | -3.46 | short chain dehydrogenase/oxidoreductase, putative |
| 74 | <b>AFLA_062860</b> | -1.15 | glycerol-3-phosphate O-acyltransferase, putative   |
| 74 | <b>AFLA_062810</b> | 1.15  | fatty acid desaturase, putative                    |
| 74 | <b>AFLA_062850</b> | 3.26  | hypothetical protein                               |
| 74 | <b>AFLA_062820</b> | 3.38  | polyketide synthase, putative                      |
| 74 | <b>AFLA_062800</b> | 3.98  | conserved hypothetical protein                     |
